# Supplementary material for: Use of metabolomics for predicting spontaneous preterm birth in asymptomatic pregnant women: protocol for a systematic review and meta-analysis
Source: PubMed Central journal article supplement (PMC6429842; doi:10.1136/bmjopen-2018-026033), 2019-03-04
Supplement: bmjopen-2018-026033supp001.pdf [file bmjopen-2018-026033supp001.pdf]

Search strategy: #1 AND #2 AND #3

1 (OR for each term)

- preterm birth
- premature birth
- premature infant
- premature labor
- extremely premature infant
- premature obstetric labor
- spontaneous preterm birth
- extreme preterm birth
- late preterm birth
- moderate preterm birth
- preterm premature rupture of membranes
- preterm delivery
- PROM
- sPTB
- preterm PROM
- pPROM
- p-PROM

2 (OR for each term)

- metabolomic\*
- metabonomic\*
- metabolit\*
- lipidomic\*
- H NMR
- proton NMR
- proton nuclear magnetic resonance
- liquid chromatogra\*
- UPLC
- ultra-performance liquid chromatograph\*
- ultra performance liquid chromatograph\*
- HPLC
- high performance liquid chromatograph\*
- high-performance liquid chromatograph\*

3 (OR for each term)

- pregnan\*
- antenat\*
- ante nat\*
- prenat\*
- pre nat\*
